# Supplementary material for: An approach to detecting a reducing gas by radial modulation of electron-depleted shells in core–shell nanofibers
Source: Royal Society of Chemistry journal article supplement (doi:10.1039/c3ta13087h), 2013-01-01
Supplement: c3ta13087h.pdf [file c3ta13087h.pdf]

## Supporting Information

**Table S1** Sensitivity, response and recovery times of SnO<sub>2</sub>-ZnO CSNs sensors for 1 ppm CO or NO<sub>2</sub>.

| Shell thickness (nm) | Gas concentration (1 ppm) |                 |                     |                 |                     |                 |
|----------------------|---------------------------|-----------------|---------------------|-----------------|---------------------|-----------------|
|                      | Sensitivity               |                 | Response time (sec) |                 | Recovery time (sec) |                 |
|                      | CO                        | NO <sub>2</sub> | CO                  | NO <sub>2</sub> | CO                  | NO <sub>2</sub> |
| 0                    | 1.3                       | 48.0            | 276                 | 217             | 355                 | 46              |
| 5                    | 1.7                       | 3.0             | 440                 | 75              | 448                 | 43              |
| 20                   | 6.5                       | 1.6             | 203                 | 69              | 252                 | 62              |
| 35                   | 1.8                       | 2.7             | 186                 | 209             | 368                 | 226             |
| 70                   | 2.3                       | 3.2             | 179                 | 198             | 448                 | 191             |
| 120                  | 0.9                       | 2.7             | 494                 | 195             | 605                 | 149             |

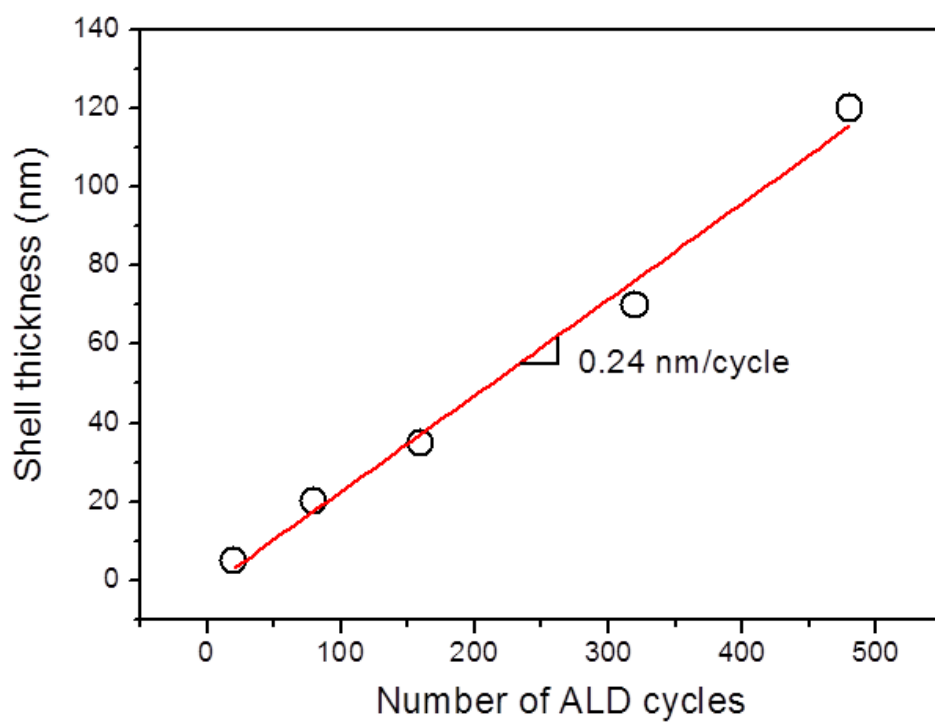

**Fig. S1** ZnO shell thickness of SnO<sub>2</sub>-ZnO CSNs as a function of the number of ALD cycles. The slope corresponds to the growth rate of ZnO shells.

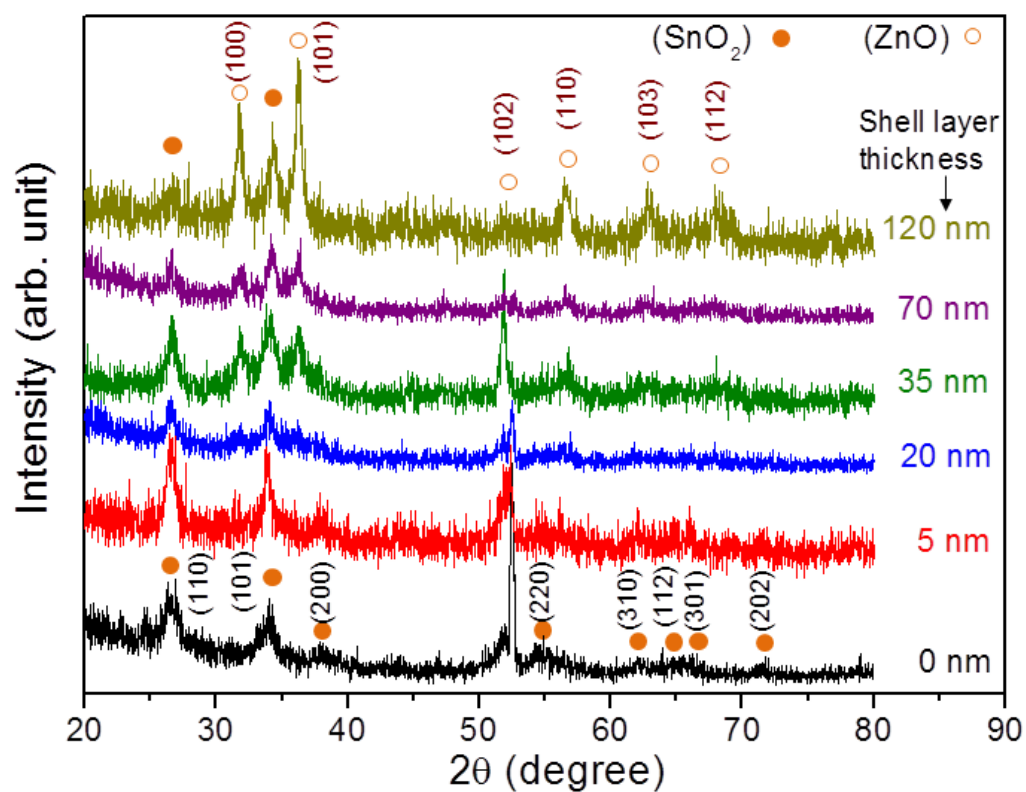

**Fig. S2** XRD patterns of SnO<sub>2</sub>-ZnO CSNs prepared with different numbers of ALD cycles. For comparison, an XRD pattern of bare SnO<sub>2</sub> nanofibers is included.

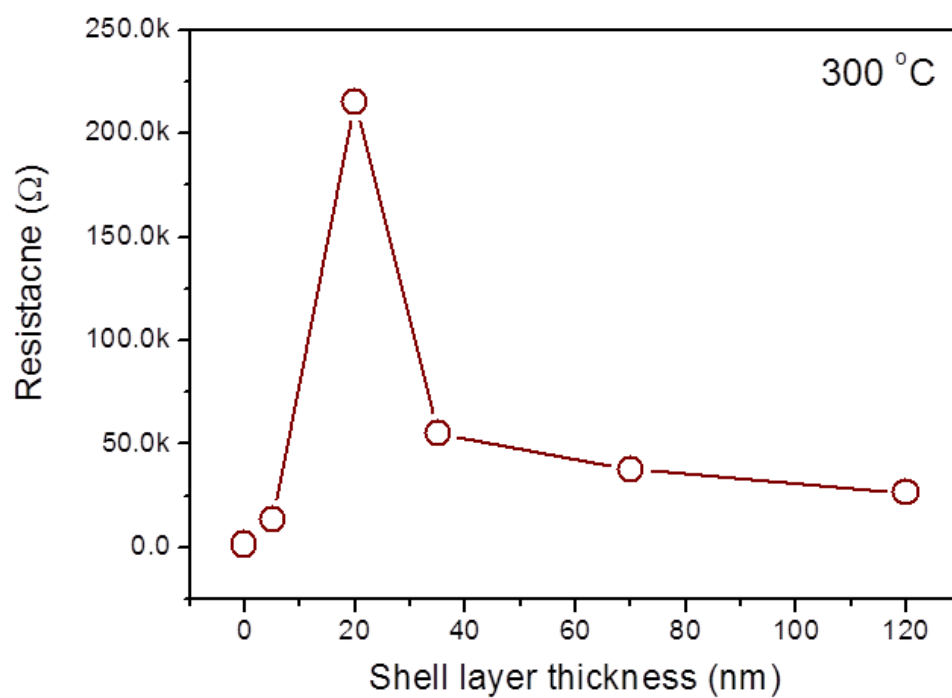

**Fig. S3** Change of the resistance of SnO<sub>2</sub>-ZnO CSNs as a function of shell thickness in air at 300 °C.
